# Supplementary material for: Situla Art: An Iron Age Artisanal Tradition Found Between the Apennines and the Eastern Alps and Its Identity Valencies
Source: Springer Nature journal article supplement (doi:10.1007/s10963-023-09174-6), 2023-03-01
Supplement: MOESM3 [file 25338676]

Online Resource 3 – Situla Art: an Iron Age artisanal tradition found between the Apennines and the eastern Alps and its identity valencies, *Journal of World Prehistory*, 36(1). Fabio Saccoccio, Fabio.Saccoccio2@nottingham.ac.uk; ORCID 000-0002-5531-5814. University of Nottingham, Department of Classics and Archaeology, Nottingham NG7 2RD, UK

### Online Resource 3

Annibaldi, G. (1960). Grottazzolina (Ascoli Piceno). – Rinvenimento di tombe picene. *Notizie degli Scavi di Antichità, Series 8, Volume 14*, 366–392.

Arias, P. E. (1952). Umbone figurato di scudo dal Carpena (Forlì). *Studi Romagnoli*, 3, 313–320.

Arias, P. E. (1962). Due situle bronzee paleovenete a Spina. In M. Renard (Ed.), *Hommages à Albert Grenier* (Collection Latomus 58) (pp. 141–144). Latomus.

Baggio, E. (1978a). 15. Necropoli del nord. In A. Aspes (Ed.), *L'arte preistorica nell'Italia settentrionale dalle origini alla civiltà paleoveneta* (pp. 101–102 and fig. 29, no. 3). Linotipia Alfio Fiorini.

Baggio, E. (1978b). 16. Necropoli del nord. In A. Aspes (Ed.), *L'arte preistorica nell'Italia settentrionale dalle origini alla civiltà paleoveneta* (pp. 102–103 and fig. 29, no. 4). Linotipia Alfio Fiorini.

Baldini Cornacchione, C., Buson, S., Capuis, L., & Chieco Bianchi, A.M. (2019). Osservazioni su cinture e cinturoni di Este. In G. Cresci Marrone, G. Gambacurta, & A. Marinetti (Eds.), *Il dono di Altino: Scritti di archeologia in onore di Margherita Tirelli* (Antichistica 23; Archeologia 5) (pp. 35–55). Edizioni Ca' Foscari.

Barth, F. E. (1999). Zu den im Situlenstil Verzierten Gürtelblechen aus Brezje, Slowenien. *Archäologisches Korrespondenzblatt*, 29, 57–59.

Bartoloni, G., & Morigi Govi, C. (1995). Etruria and Situla Art: the Certosa situla – new perspectives. In J. Swaddling, S. Walker, & P. Roberts (Eds.), *Italy in Europe: Economic Relations 700BC – AD50* (British Museum Occasional Paper 97) (pp. 159–176). Department of Greek and Roman Antiquities.

Bermond Montanari, G. (1960). Gancio di cinturone paleoveneto dalla necropoli spinetica di Valle Trebba. In *Civiltà del Ferro: Studi pubblicati nella ricorrenza centenaria della scoperta di Villanova* (Documenti e Studi a cura della Deputazione Patria per le Provincie di Romagna 6) (pp. 349–360). Arnaldo Forni Editore.

Bianchi Citton, E. (2013). 6.5 Lamina figurata. In M. Gamba, G. Gambacurta, A. Ruta Serafini, V. Tiné, & F. Veronese (Eds.), *Venetkens: viaggio nella terra dei Veneti antichi* (pp. 291, 293 and fig. 6.5). Marsilio Editori.

- Bianchin Citton, E. (2014). Topografia e sviluppo di un centro preromano della fascia pedemontana veneta. Il caso di Montebelluna. In G. Baldelli & F. Lo Schiavo (Eds.), *Amore per l'antico. Dal Tirreno all'Adriatico, dalla Preistoria al Medioevo e oltre. Studi di antichità in ricordo di Giuliano de Marinis* (Vol. 2, pp. 999–1006). Scienze e Lettere.
- Bianchin Citton, E., & Malnati, L. (2001). Reperti bronzei protostorici dai fiumi veneti: offerte votive, contesti funerari o ripostigli? In G. Cresci Marrone & M. Tirelli (Eds.), *Orizzonti del sacro. Culti e santuari antichi in Altino e nel Veneto orientale. Venezia 1-2 dicembre 1999* (pp. 197–223). Edizioni Quasar.
- Bianco Peroni, V. (1976). *Die Messer in Italien / I coltelli nell'Italia continentale* (Prähistorische Bronzefunde VII, 2). Beck.
- Blečić Kavur, M. (2014). *Uhvati pravu ravnotežu! Osor u ravnoteži europskih kultura i civilizacija posljednji stoljeća stare ere / Get the balance right! Osor in balance of European cultures and civilizations in the last centuries BC*. Koper: University of Primorska Press.
- Blečić Kavur, M. (2015). *Provezanost perspective: Osor u kulturnim kontaktima mladeg željeznog doba / A coherence of perspective: Osor in cultural contacts during the Late Iron Age*. Koper: University of Primorska Press.
- Bondini, A. (2005). I materiali di Montebello Vicentino. Tra cultura veneto-alpina e civiltà di La Tène. In D. Vitali & A. Bondini (Eds.), *Studi sulla media e tarda età del Ferro nell'Italia settentrionale* (Studi e Scavi, nuova serie 12) (pp. 215–324). Ante Quem.
- Bondini, A. (2008). *Il 'IV Periodo atestino': i corredi funerari tra IV e II secolo a.C. in Veneto*. Unpublished PhD thesis at the University of Bologna.
- Bonfanti, M., Dal Ri, L. & Rizzi, G. (1985). Necropoli di San Maurizio. In *Scavi nella conca di Bolzano e nella Bassa Atesina 1976 – 1985 / Ausgrabungen im Raum Bozen und im Unterland 1976 – 1985* (pp. 125–129). Bolzano/Bozen: Tipografia Presel.
- Božič, D. (2015). Die Situla von Vače gehörte einem Doppelkammhelmträger. In C. Gutjahr & G. Tiefengraber (Eds.), *Beiträge zur Hallstattzeit am Rande der Südstalpen: Akten des 2. Internationalen Symposiums am 10. und 11. Juni 2010 in Wildon (Steiermark/Österreich)* (Internationale Archäologie – Arbeitsgemeinschaft, Symposium, Tagung, Kongress 19) (pp. 107–115). Leidorf.
- Buson, S. (2015a). Montagnana, fondo Fracasso. La situla: restauro e valorizzazione. *Notizie di Archeologia del Veneto*, 3(2014), 258–262.

- Buson, S. (2015b). La situla di Pieve d'Alpago: note di tecnologia e di ricostruzione sperimentale. In G. Gangemi, M. Bassetti, & D. Voltolini (Eds.), *Le signore d'Alpago: La necropoli preromana di 'Pian de la Gnela', Pieve d'Alpago (Belluno)* (pp. 187–192 and pls. IX-XI). Canova Edizioni.
- Buson, S. (2021a). Coperchio Randi. In F. Gonzato, B. Grassi, & D. Voltolini (Eds.), *Le fiere della vanità: l'arte dei Veneti antichi* (pp. 16–17). Vago di Lavagno: Tipolitografia La Grafica Editrice.
- Buson, S. (2021b). Situla Benvenuti. In F. Gonzato, B. Grassi, & D. Voltolini (Eds.), *Le fiere della vanità: l'arte dei Veneti antichi* (pp. 48–49). Vago di Lavagno: Tipolitografia La Grafica Editrice.
- Buson, S. (2022) La situla della Certosa: restauri, tecnologia e ricostruzione sperimentale. In L. Zaghetto, *La situla Certosa di Bologna. Alle origini della ritualità nell'Italia protostorica* (Ricerche 9) (pp. 481–496). Ante Quem.
- Buson, S., & Grassi, B. (2021). Elmo da Sesto Calende. Elmo da Grandate. In F. Gonzato, B. Grassi, & D. Voltolini (Eds.), *Le fiere della vanità: l'arte dei Veneti antichi* (pp. 40–41). Vago di Lavagno: Tipolitografia La Grafica Editrice.
- Callegari, A. (1930). Di una tomba scoperta a Pra di Este. *Studi Etruschi*, 4, 127–134 and pls. XV–XVI.
- Campi, L. (1885). Il sepolcreto di Meclo nella Naunia. *Archivio Trentino*, 4(1), 61–112 and pls. II–VI.
- Campi, L. (1888). Scavi e scoperte fatte negli anni 1885 - 1886 nello stabile a Valemporga di Meclo nell'Anaunia. *Archivio Trentino*, 7(2), 129–184 and pls. I–VI.
- Campi, L. (1900). Nuove scoperte archeologiche in Mechel nell'Anaunia. *Archivio Trentino*, 15(1), 3–43 and pls. I-II.
- Camporeale, G. (1984). La scena di caccia nell'arte delle situle. In M. G. Marzi Costagli & L. Tamagno Perna (Eds.), *Studi di antichità in onore di Guglielmo Maetzke* (Vol. 1, pp. 165–181 and pls. I–VI). Giorgio Bretschneider Editore.
- Candelato, F., Colonna, C., Lavarini, C., Morandini, A., Neri, D., Salzani, L., & Saracino, M. (2008). Le ricerche di superficie: nuovi e vecchi dati. In A. Guidi & L. Salzani (Eds.), *Oppeano: Vecchi e nuovi dati sul centro protourbano* (Quaderni di Archeologia del Veneto, Serie Speciale 3) (pp. 117–163). Quinto di Treviso: Europrint.
- Capuis, L. (1993). *I Veneti: Società e cultura di un popolo dell'Italia preromana* (Biblioteca di Archeologia 19). Longanesi & C.
- Capuis, L. (2021). Oltre i racconti. In F. Gonzato, B. Grassi, & D. Voltolini (Eds.), *Le fiere della vanità: l'arte dei Veneti antichi* (pp. 50–53). Vago di Lavagno: Tipolitografia La Grafica Editrice.

- Capuis, L., & Chieco Bianchi, A. M. (2006). *Este II: La necropoli di villa Benvenuti* (Monumenti Antichi pubblicati per cura della Accademia Nazionale dei Lincei, Serie Monografica volume 7, 64 della Serie Generale). Giorgio Bretschneider Editore.
- Capuis, L., & Chieco Bianchi, A. M. (2010). *Le lamine figurate del santuario di Reitia a Este (scavi 1880-1916 e 1987-1991) / Die figural verzierten votivbleche aus dem Reitia-heiligtum von Este (ausgrabungen 1880-1916 und 1987-1991)* (Studien zu Vor- und Früh- Geschichtlichen Heiligtümern 6,1; Il Santuario di Reitia a Este 5,1). Phillip von Zabern.
- Capuis, L., & Chieco Bianchi, A. M. (2020). *Le lamine figurate del santuario di Reitia a Este II (scavi 1880-1916 e 1987-1991) / Die Figural Verzierten Votivbleche aus dem Reitia-Heiligtum von Este II (Ausgrabungen 1880-1916 und 1987-1991)* (Studien zu Vor- und Früh- Geschichtlichen Heiligtümern 6,2; Il Santuario di Reitia a Este 5,2). Nünnerich-Asmus Verlag & Media.
- Capuis, L., & Chieco Bianchi, A.M. (1992). Este preromana: vita e cultura. In Tosi, G. (Ed.), *Este antica dalla preistoria all'età romana* (pp. 41–108). Este: Zielo.
- Capuis, L., & Ruta Serafini, A. (1996). Nuovi Documenti di Arte delle Situle nel Veneto. In E. Jerem & A. Lippert (Eds.), *Die Osthallstattkultur. Akten des Internationalen Symposiums, Sopron, 10.-14. Mai 1994* (Archaeolingua 7) (pp. 37–46). Archaeolingua.
- Carancini, G.L. (1984). *Le asce nell'Italia continentale II* (Prähistorische Bronzefunde IX, 12). Beck.
- Casini, S., & de Marinis, R. C. (2005). La città etrusca del Forcello. In R. C. de Marinis & M. Rapi (Eds.), *L'abitato etrusco del Forcello di Bagnolo S. Vito (Mantova): Le fasi di età arcaica* (pp. 35–53). Mantua: Tipo-Lito Operaia.
- Càssola Guida, P. (2022). Dall'Etruria al mondo veneto: qualche osservazione sull' 'arte delle situle'. In M. Gamba, G. Gambacurta, F. Gonzato, E. Pettenò, & F. Veronese (Eds.), *Metalli, creta, una piuma d'uccello ... Studi di archeologia per Angela Ruta Serafini (da W. Szyborska, Museo, v.11)* (Documenti di Archeologia 67) (pp. 197–202). Quingentole: SAP Società Archeologica s.r.l.
- Cavedoni, C. (1842). Della cista mistica e dello specchio etrusco del sepolcreto di Castelvetro. *Annali dell' Instituto di Corrispondenza Archeologica*, 14, 67–82 and pls. G-H.
- Chieco Bianchi, A. M. (1976). Il gruppo di vicolo S. Massimo – via Tiepolo. In G. Fogolari, A. M. Chieco Bianchi, M. P. Marchese, & P. Mura (Eds.), *Padova preromana. Nuovo Museo Civico agli Eremitani. Padova, 27 giugno – 15 novembre 1976* (pp. 244–296 and pls. 52B–78). Padua: Antoniana S.p.A.
- Chieco Bianchi, A. M. (1984). Este. In A. Aspes (Ed.), *Il Veneto nell' antichità: preistoria e protostoria* (Vol. 2, pp. 693–724). Grafiche Fiorini.

- Chieco Bianchi, A. M. (1987). Dati preliminari su nuove tombe di III secolo da Este. In D. Vitali (Ed.), *Celti ed etruschi nell'Italia centro-settentrionale dal V secolo a.C. alla romanizzazione. Atti del Colloquio Internazionale, Bologna 12-14 aprile 1985* (pp. 191–236). University Press Bologna.
- Chieco Bianchi, A. M., & Calzavara Capuis, L. (1985). *Este I: La necropoli Casa di Ricovero, Casa Muletti Prosdocimi e Casa Alfonsi* (Monumenti Antichi pubblicati per cura della Accademia Nazionale dei Lincei, Serie Monografica 2, 51 della Serie Generale). Giorgio Bretschneider Editore.
- Chierici, G. (1880). La situla figurata della Certosa illustrata dal Zannoni. *Bullettino di Paleontologia Italiana*, 6, 96–103 and pl. VII.
- Ciurletti, G. (1978). Mechel (Cles-Val di Non – Trento). In A. Aspes (Ed.), *L'arte preistorica nell'Italia settentrionale dalle origini alla civiltà paleoveneta* (pp. 121–123 and fig. 41, nos. 1–10). Linotipia Alfio Fiorini.
- Coen, A. (2008). 232. Cista bronzea. In M. Silvestrini & T. Sabbatini (Eds.), *Potere e Splendore. Gli antichi Piceni a Matelica. 19 aprile – 31 ottobre 2008, Matelica, Palazzo Ottoni* (pp. 193–194). 'L'Erma' di Bretschneider.
- Coen, A. (2012). Il bestiario di età orientalizzante e arcaica in area picena: modelli di riferimento e tradizioni locali. In M. C. Biella, E. Giovanelli, & L. G. Perego (Eds.), *Il bestiario fantastico di età orientalizzante nella penisola italiana* (Aristonothos 1 [2013]) (pp. 207–238). Trento: Tangram Edizioni Scientifiche.
- Colonna, G. (1980). Rapporti artistici tra il mondo paleoveneto e il mondo etrusco. In A. Neppi Modona, M. G. Costagli, & L. Tamagno Perna (Eds.), *Este e la civiltà paleoveneta a cento anni dalle prime scoperte. Atti dell'XI Convegno di Studi Etruschi e Italici, Este - Padova, 27 giugno – 1 luglio 1976* (pp. 177–190 and pls. XXI-XXVIII). Leo S. Olschki.
- Cook, R. M., & Dupont, P. (1998). *East Greek Pottery*. Routledge.
- d'Ercole, V., & Grassi, B. (2000). Necropoli protostoriche abruzzesi a sud della Salaria. In E. Catani & G. Paci (Eds.), *La Salaria in età antica. Atti del Convegno di studi, Ascoli Piceno – Offida – Rieti, 2-4 ottobre 1997* (pp. 193–262 and pls. I–IV). 'L'Erma' di Bretschneider.
- Dal Ri, L. (1987). Influssi etrusco-italici nella regione retico-alpina. In R. de Marinis (Ed.), *Gli Etruschi a nord del Po* (Vol. 2, pp. 160–179). Mantua: Publi-Paolini.
- Dal Ri, L. (1992a). Note sull'insediamento e sulla necropoli di Vadena (Alto Adige). In I. R. Metzger & P. Gleirscher (Eds.), *Die Räter / I Reti* (pp. 475–522). Bolzano/Bozen: Athesia.
- Dal Ri, L. (1992b). Etruskische Einflüsse im Etschtal. In L. Aigner-Foresti (Ed.), *Etrusker Nördlich von Etrurien. Etruskische Präsenz in Norditalien und nördlich der Alpen sowie ihre Einflüsse auf die*

- einheimischen Kulturen. Akten des Symposions von Wien – Schloß Neuwaldegg 2.-5. Oktober 1989. Bildband* (Österreichische Akademie der Wissenschaften Philosophisch-Historische Klasse Sitzungberichte 589) (pp. 23–30). Österreichische Akademie der Wissenschaften.
- Dal Ri, L., & Flores, M. (1985). Schede descrittive di San Maurizio (necropoli) / Beschreibung der Fundstücke aus Moritzing (Nekropole). In *Scavi nella conca di Bolzano e nella Bassa Atesina 1976 – 1985 / Ausgrabungen im Raum Bozen und im Unterland 1976 – 1985* (pp. 130–136). Bolzano/Bozen: Tipografia Presel.
- Dämmer, H.-W., Gambacurta, G., Meller, H., Miller, B., Radke, T., & Meffert, J. (2002). Il santuario sud-orientale. Le indagini recenti. In A. Ruta Serafini (Ed.), *Este preromana: una città e i suoi santuari* (pp. 248–269 and 296). Canova Edizioni.
- de Marinis, R. C. (1987). Figurine votive. In R. C. de Marinis (Ed.), *Gli Etruschi a nord del Po* (Vol. 1, pp. 281–285). Mantua: Publi-Paolini.
- de Marinis, R. C. (2009). Sesto Calende, la seconda tomba di guerriero. In R. C. de Marinis, S. Massa, & M. Pizzo (Eds.), *Alle origini di Varese e del suo territorio: le collezioni del sistema archeologico provinciale* (Bibliotheca Archaeologica 44) (pp. 162–203). ‘L’Erma’ di Bretschneider.
- Di Filippo Balestrazzi, E. (1980). Nuovi confronti iconografici e un’ipotesi sui rapporti fra l’area delle situle e il mondo orientale. In A. Neppi Modona, M. G. Costagli, & L. Tamagno Perna (Eds.), *Este e la civiltà paleoveneta a cento anni dalle prime scoperte. Atti dell’XI Convegno di Studi Etruschi e Italici, Este - Padova, 27 giugno – 1 luglio 1976* (pp. 153–170 and pls. XVI-XX). Leo S. Olschki.
- Ducati, P. (1923). *La situla della Certosa. Memoria presentata il 29 giugno 1923 alla classe di Scienze Morali della R. Accademia delle Scienze dell’Istituto di Bologna*. Bologna: Stabilimenti Poligrafici Riuniti.
- Dular, J. (2016). Der eisenzeitliche Zentralort Vače und seine kriegerische Elite / Železnodobno središče Vače in njegova bojevniška elita. *Arheološki vestnik*, 67, 73–104.
- Egg, M. (1992). Ein eisenzeitlicher Altfund von Schloß Greifenstein bei Siebeneich in Südtirol. In K. Spindler & A. Lippert (Eds.), *Festschrift zum 50jährigen Bestehen des Institutes für Ur- und Frühgeschichte der Leopold-Franzens-Universität Innsbruck* (Universitätsforschungen zur prähistorischen Archäologie Aus dem Institut für Ur- und Frühgeschichte der Universität Innsbruck 8) (pp. 135–172). Habelt.
- Egg, M., & Lehnert, R. (2011). Kampf oder Execution? Einige Anmerkungen zu den figural verzierten Bronzesitulen aus Grab 33, Hügel III von Novo mesto-Kandja, Slowenien. *Arheološki vestnik*, 62, 231–260.

- Egg, M., Hauschild, M., & Schönfelder, M. (2006). Zum Frühlatènezeitlichen Grab 994 mit Figural Verzierter Schwertscheide von Hallstatt (Oberösterreich). *Jahrbuch des Römisch-Germanischen Zentralmuseums*, 53, 175–216 and pls. 1–4.
- Eibner, A. (2001). Die Eberjagd als Ausdruck eines Heroentums? Zum Wandel des Bildinhalts in der Situlenkunst am Beginn der Latènezeit. In B. Gedigi, A. Mierzwińskiego, & W. Piotrowskiego (Eds.), *Sztuka epoki brązu i wczesnej epoki żelaza w Europie Środkowej* (Polska Akademia Nauk – Oddział we Wrocławiu, Prace Komisji Archeologicznej 14. Muzeum Archeologiczne w Biskupinie, Biskupińskie Prace Archeologiczne 2) (pp. 231–279). Wrocław & Biskupin: Polska Akademia Nauk – Oddział we Wrocławiu.
- Ferrari, C., & Salzani, L. (2018a). Catalogo di altri rinvenimenti a Ca' del Ferro. In L. Salzani, *Necropoli dei Veneti antichi a Ca' del Ferro di Oppeano (Verona)* (Documenti di Archeologia 60) (pp. 152–167). Quingentole: SAP Società Archeologica s.r.l.
- Fiorin, E. (2015). Lo studio antropologico dei resti cremati. In G. Gangemi, M. Bassetti, & D. Voltolini (Eds.), *Le signore dell'Alpago. La necropoli preromana di 'Pian de la Gnela', Pieve d'Alpago (Belluno)* (pp. 235–237). Canova Edizioni.
- Fogolari, G. (1975). La protostoria delle Venezie. In *Popoli e civiltà dell'Italia antica* 4 (pp. 61–222). Biblioteca di Storia Patria.
- Fogolari, G. (1976). Alcune note sull'“arte delle situle”. In *Aquileia e l'arco alpino orientale* (Antichità Altoadriatiche 9) (pp. 61–70). Udine: Arti Grafiche Friulane.
- Fogolari, G. (1984). La civiltà paleoveneta. In A. Aspes (Ed.), *Il Veneto nell'antichità: preistoria e protostoria* (Vol. 2, pp. 661–692). Grafiche Fiorini.
- Fogolari, G. (1988). La cultura. In G. Fogolari & A. L. Prodocimi (Eds.), *I Veneti Antichi: Lingua e cultura* (Il mito e la storia, Serie maggiore 2) (pp. 13–195). Padua: Editoriale Programma.
- Fogolari, G. de', Kastelic, J., Kromer, K., Mansuelli, G. A., & Modrijan, W. (1961). Catalogo. In *Arte delle Situle dal Po al Danubio. Mostra dell'arte delle situle dal Po al Danubio (VI – IV secolo a. C.)*. Padova – Lubiana – Vienna. Padova 1961 (pp. 73–121, pls. 1–52 and A-H). Sansoni.
- Frey, O.-H. (1966a). Der Ostalpenraum und die antike Welt in der frühen Eisenzeit. *Germania*, 44, 48–66 and pls. 1–8.
- Frey, O.-H. (1966b). Eine figürlich verzierte Ziste in Treviso. *Germania*, 44, 66–73.
- Frey, O.-H. (1969). *Die Entstehung der Situlenkunst: Studien zur figürlich verzierten Toreutik von Este* (Römisch-Germanische Forschungen 31). De Gruyter.

- Frey, O.-H. (1992). Beziehungen der Situlenkunst zum Kunstschaffen Etruriens. In L. Aigner-Foresti (Ed.), *Etrusker Nördlich von Etrurien. Etruskische Präsenz in Norditalien und nördlich der Alpen sowie ihre Einflüsse auf die einheimischen Kulturen. Akten des Symposions von Wien – Schloß Neuwaldegg 2.-5. Oktober 1989. Bildband* (Österreichische Akademie der Wissenschaften Philosophisch-Historische Klasse Sitzungberichte 589) (pp. 31–34). Österreichische Akademie der Wissenschaften.
- Fuchs, M. (1997). KG Möderndorf, SG Hermagor-Presssegger See, VB Hermagor. *Fundberichte aus Österreich*, 35(1996), 448–450.
- Gabrovec, S. (1960). Grob z oklepom iz Novega mesta. *Situla*, 1, 27–79.
- Gabrovec, S. (1962-1963). Halštatske čelade jugovzhodnoalpskega kroga. *Arheološki vestnik*, 13–14, 293–325 and pls. I–XXII.
- Gabrovec, S. (1965). Kronologija čelad negovskega tipa. *Situla*, 8, 177–186.
- Gabrovec, S. (1966). Zur Hallstattzeit in Slowenien. *Germania*, 44, 1–48.
- Gamba, M. (2013). 2.3.14. Placca di cintura. In M. Gamba, G. Gambacurta, A. Ruta Serafini, V. Tiné, & F. Veronese (Eds.), *Venetkens: viaggio nella terra dei Veneti antichi* (pp. 218–219). Marsilio Editori.
- Gamba, M., Gambacurta, G., & Ruta Serafini, A. (2013). Magnifici, focosi, scintillanti. I cavalli nell'arte delle situle. *Archeologia Veneta*, 35, 128–147.
- Gambacurta, G., & Brustia, M. (2001). Vasellame metallico ed oggetti vari. In G. Fogolari & G. Gambacurta (Eds.), *Materiali veneti preromani e romani del santuario di Lagole di Calalzo al Museo di Pieve di Cadore* (Collezioni e Musei Archeologici del Veneto 44) (pp. 247–274). Giorgio Bretschneider Editore.
- Gambacurta, G., & Zaghetto, L. (2002). Il santuario settentrionale. In A. Ruta Serafini (Ed.), *Este preromana: una città e i suoi santuari* (pp. 283–295 and 297–298). Canova Edizioni.
- Gambari, F.M. (2016). Cenni sull'evoluzione della struttura sociale nella cultura di Golasecca. In B. Grassi & C. Mangani (Eds.), *Nel bosco degli antenati. La necropoli del Monsorino di Golasecca (scavi 1985-86)* (pp. 157–167). All'Insegna del Giglio.
- Gangemi, G. (2013). 6.9 Situla istoriata. In M. Gamba, G. Gambacurta, A. Ruta Serafini, V. Tiné, & F. Veronese (Eds.), *Venetkens: viaggio nella terra dei Veneti antichi* (pp. 293–294 and fig. 6.9). Marsilio Editori.



- Gangemi, G. (2015). La situla istoriata. In G. Gangemi, M. Bassetti, & D. Voltolini (Eds.) *Le signore dell'Alpago. La necropoli preromana di 'Pian de la Gnela', Pieve d'Alpago (Belluno)* (pp. 113–117). Canova Edizioni.
- Gehring, B. (1976). Die Fibeln von Mechel (Meclo im Nonsberg). *Archaeologia Austriaca*, 59–60, 143–174.
- Gerhardinger, M. E. (1992). *Reperti paleoveneti del Museo Civico di Treviso* (Collezioni e Musei Archeologici del Veneto 37). Giorgio Bretschneider Editore.
- Gerhardinger, M. E. (2013). 6.10 Cista figurata. In M. Gamba, G. Gambacurta, A. Ruta Serafini, V. Tiné, & F. Veronese (Eds.), *Venetkens: viaggio nella terra dei Veneti antichi* (p. 294 and fig. 6.10). Marsilio Editori.
- Geupel, F. (1972). Funde der späten Hallstattzeit aus Krajina, Slovenija. *Forschungen und Berichte, 14, Archäologische Beiträge*, 203–208.
- Ghirardini, G. (1888). *La collezione Baratela di Este* (Contributi dell'Archeologia dell'Italia Superiore). Tipografia della R. Accademia dei Lincei.
- Ghirardini, G. (1901). La situla italia primitiva studiata specialmente ad Este. Parte terza: l'ornamentazione zoomorfica. *Monumenti Antichi pubblicati per cura della Reale Accademia dei Lincei*, 10, 5–222 and pls. I–V.
- Ghirardini, G. (1906). Paletta primitiva italia. *Bullettino di Paletnologia Italiana*, 32, Serie 4(2), 271–281.
- Ghislanzoni, E. (1931). Sanzeno nell'Anaunia. – Scavi di abitazioni preromane. *Notizie degli Scavi di Antichità*, 7(10-12), 409-471.
- Giordani, N. (2016). *Mantua: una città romana*. In N. Giordani (Ed.), *Museo Archeologico Nazionale di Mantova. Mantua: una città romana* (pp. 13–53). Mantua: Publi Paolini.
- Gleirscher, P. (1994). Ein Schalenstein in einem späthallstattzeitlichen Häuptlingsgrab in Waisenberg (Gem. Völkermarkt, Kärnten). *Archäologie Österreichs*, 5(1), 46–50.
- Gleirscher, P. (2009a). Ente, Entenmann und Heros in der Stulenkunst. Zur mythologischen Deutung eines Deckelfrieses mit Tierbildern aus Weisenberg (Kärnten). *Germania*, 87, 411–436.
- Gleirscher, P. (2009b). Bildgeschichten und ihre Deutung. Zwei hallstattzeitliche Neufunde aus Kärnten. *Archäologie Österreichs*, 20(2), 4–16.

- Gleirscher, P. (2009c). Zu Gast bei den norischen Königen von Waisenberg. Herdgerät und Trinkgeschirr aus dem zweiten Prunkgrab. *Rudolfinum: Jahrbuch des Landesmuseums Kärnten* (2008), 35–58.
- Gleirscher, P. (2011). Un flabello decorato nell'arte delle situle di Waisenberg (Carinzia). *Notizie Archeologiche Bergomensi*, 19, 327–343.
- Grassi, B., & Voltolini, D. (2021). Racconti per tante genti. In F. Gonzato, B. Grassi, & D. Voltolini (Eds.), *Le fiere della vanità: l'arte dei Veneti antichi* (pp. 54–57). Vago di Lavagno: Tipolitografia La Grafica Editrice.
- Gropo, V. (2013). 10.5.9 Paletta rituale figurata e iscritta. In M. Gamba, G. Gambacurta, A. Ruta Serafini, V. Tiné, & F. Veronese (Eds.), *Venetkens: viaggio nella terra dei Veneti antichi* (p. 381). Marsilio Editori.
- Hencken, H., & Wells, P. S. (1978). *The Iron Age Cemetery of Magdalenska gora in Slovenia. Mecklenburg Collection, Part II* (American School of Prehistoric Research, Peabody Museum, Harvard University, Bulletin no. 32). Peabody Museum of Archaeology and Ethnology Harvard University.
- Jorio, S. (2021). Coperchio di situla da Grandate (2011). In F. Gonzato, B. Grassi, & D. Voltolini (Eds.), *Le fiere della vanità: l'arte dei Veneti antichi* (pp. 34–35). Vago di Lavagno: Tipolitografia La Grafica Editrice.
- Knez, T. (1986). *Novo Mesto I* (Carniola Archaeologica 1). Novo Mesto: Dolenjski muzej.
- Križ, B. (1997). *Novo Mesto IV. Kapiteljska njiva Gomila II in gomila III* (Carniola Archaeologica 4). Novo Mesto: Dolenjski muzej.
- Kromer, K. (1959). *Das Gräberfeld von Hallstatt*. Sansoni.
- Kruta, V. (1992). *L'Europe des origines: La Protohistoire 6000-500 avant. J.-C.* (L'Univers de Formes 38). Éditions Gallimard.
- Laviosa Zambotti, P. (1938). *Le civiltà preistoriche e protostoriche nell'Alto Adige: documentazione archeologica* (Monumenti Antichi pubblicati per cura della Accademia Nazionale dei Lincei 37). Dott. Giovanni Bardi.
- Longhi, C., & Voltolini, D. (Eds.) (2020). *La Situla di Caravaggio. Un capolavoro inaspettato* (Guide MAGO 1). Quingentole: SAP Società Archeologica s.r.l.
- Lucke, W., & Frey, O.-H. (1962). *Die situla in Providence (Rhode Island). Ein Beitrag zur Situlenkunst des Osthallstattkreises* (Römisch-Germanische Forschungen 26). De Gruyter.

- Macellari, R. (2002a). *Il sepolcreto etrusco nel terreno Arnoaldi di Bologna (550-350 a.C.): volume I* (Cataloghi delle Collezioni del Museo Civico Archeologico di Bologna). Marsilio Editori.
- Macellari, R. (2002b). *Il sepolcreto etrusco nel terreno Arnoaldi di Bologna (550-350 a.C.): volume II*. (Cataloghi delle Collezioni del Museo Civico Archeologico di Bologna). Marsilio Editori.
- Mahr, A. (1934). Catalogue. In A. Mahr (Ed.), *Prehistoric Grave Material from Carniola excavated in 1905-14 by H. H. the Late Duchess Paul Friederich of Mecklenburg [née Princess Marie of Windischgrätz]* (pp. 3–131 and pls. I–XXX). New York: American Art Association Anderson Galleries Inc.
- Manessi, P., & Nascimbene, A. (2003). *Montebelluna: Sepolture preromane dalle necropoli di Santa Maria in Colle e Posmon* (Archaologia: Quaderni del Museo di Storia Naturale e Archeologia di Montebelluna 1). Caselle di Sommacampagna: Cierre Grafica.
- Mangani, E. (1991). L'orientalizzante recente nella valle dell'Ombrone. *AION*, 12(1990), 9–21 and figs. 1–11.
- Mansuelli, G. A. (1962). Arte delle situle. *Arte Antica e Moderna*, 18(aprile/giugno), 115–129.
- Marchesini, S., & Zaghetto, L. (2019). The Situla in Providence. A comprehensive analysis of inscription and decorative program. In S. Hye & U. Töchterle (Eds.), *UPIKU: TAUKE. Festschrift für Gerhard Tomedi zum 65. Geburtstag* (Universitätsforschungen zur prähistorischen Archäologie Aus dem Institut für Archäologien, Fachbereich Ur- und Frühgeschichte, der Universität Innsbruck 339) (pp. 329–341). Dr Rudolf Habelt.
- Marinetti, A. (2017). Iscrizione venetica su una situla figurata da Montebelluna (TV). In M. Ballerini, F. Murano, & L. Vezzosi (Eds.), *Ce qui nous est donné, ce sont les langues: studi linguistici in onore di Maria Pia Marchese* (pp. 79–95). Alessandria: Edizioni dell'Orso.
- Mazzucchi, A., & Larentis, O. (2020). Il contenuto della Situla: le analisi osteologiche. In C. Longhi, & D. Voltolini (Eds.), *La Situla di Caravaggio. Un capolavoro inaspettato* (Guide MAGO 1) (pp. 63–65). Quingentole: SAP Società Archeologica s.r.l.
- Michelini, P., & Gregnanin, R. (1998a). Tomba 20. In E. Bianchin Citton, G. Gambacurta, & A. Ruta Serafini (Eds.), ... *'presso l'Adige ridente' ... Virgilio, Eneide IX, vv. 680-681. Recenti rinvenimenti archeologici da Este a Montagnana* (pp. 164–179). Padua: ADLE Edizioni.
- Michelini, P., & Gregnanin, R. (1998b). Tomba 18. In E. Bianchin Citton, G. Gambacurta, & A. Ruta Serafini (Eds.), ... *'presso l'Adige ridente' ... Virgilio, Eneide IX, vv. 680-681. Recenti rinvenimenti archeologici da Este a Montagnana* (pp. 198–204). Padua: ADLE Edizioni.

- Michelini, P., & Panella, S. (1998). Tomba 21. In E. Bianchin Citton, G. Gambacurta, & A. Ruta Serafini (Eds.), ... *'presso l'Adige ridente' ... Virgilio, Eneide IX, vv. 680-681. Recenti rinvenimenti archeologici da Este a Montagnana* (pp. 180–194). Padua: ADLE Edizioni.
- Mihovilič, K. (1996). *Nezakcij nalaz grobnice 1981. godine / Nesactium. The Discovery of a Grave Vault in 1981* (Monografije i katalozi 6). Pula: Arheološki muzej Istre.
- Mihovilič, K. (2001). *Nezakcij. Prapovijesni nalazi 1900. – 1953 / Nesactium. Prehistoric finds 1900 – 1953* (Monografije i katalozi 11). Pula: Arheološki muzej Istre.
- Morigi Govi, C. (1971). Il tintinnabulo della 'Tomba degli Ori' dell'Arsenale Militare di Bologna. *Archeologia Classica*, 23, 211–235 and pls. L–LIV.
- Murgelj, I. (2020). Nove risbe figuralnih upodobitev na situlah z Vač in Magdalenske gore ter iz Valične vasi / Revised drawings of the situlae from Vače, Magdalenska gora and Valična vas. *Arheološki vestnik*, 71, 569–580.
- Nascimbene, A. (2013). 6.6 Fodero di coltello. In M. Gamba, G. Gambacurta, A. Ruta Serafini, V. Tiné, & F. Veronese (Eds.), *Venetkens: viaggio nella terra dei Veneti antichi* (pp. 293 and fig. 6.6). Marsilio Editori.
- Naso, A. (2000). *I Piceni: Storia e archeologia delle Marche in epoca preromana* (Biblioteca di Archeologia 29). Longanesi & C.
- Nebehay, S. (1993). *Latènegräber in Niederösterreich* (Kleine Schriften aus dem Vorgeschichtlichen Seminar der Philipps-Universität Marburg 41). Vorgeschichtliches Seminar Marburg.
- Nebelsick, L., & Schaller, C. (2022). Erotik in der Situlenkunst. In R. Gschlößl (Ed.), *Erotik in der Vor- und Frühgeschichte* (Bayerische archäologie 1) (pp. 28–33). Pustet.
- Neri, D. (2001). Notarella iconografica sullo specchio decorato proveniente dalla necropoli etrusca della Galassina (prov. MO). In C. Corti, D. Neri, & P. Pancaldi (Eds.), *Pagani e cristiani. Forme ed attestazioni di religiosità del mondo antico nell'Emilia centrale* (pp. 27–35). Bologna: Edizioni Aspasia.
- Oberrauch, L. (1978). *Schriften zur Urgeschichte Südtirols* (Archäologisch-historische Forschungen in Tirol 3). Bolzano/Bozen: Athesiadruck.
- Ott, I. (2018). Situla Art. In K. Grömer & A. Kern (Eds.), *Artifacts: Treasures of the millennia – A guide through the Prehistoric collection* (1st ed., pp. 235–243). Vienna: Natural History Museum.
- Pesavento Mattioli, S. (2001). Il santuario di Lagole nel contesto topografico del Cadore. In G. Fogolari & G. Gambacurta (Eds.), *Materiali veneti preromani e romani del santuario di Lagole di Calalzo al*

- Museo di Pieve di Cadore* (Collezioni e Musei Archeologici del Veneto 44) (pp. 43–47). Giorgio Bretschneider Editore.
- Pittioni, R. (1961). Ein neues verziertes Bronzegefäß aus Nordtirol. *Archaeologia Austriaca*, 29, 1–5.
- Pizzirani, C. (2009). *Il sepolcreto etrusco della Galassina di Castelvetro* (Studi e scavi, nuova serie 24). Ante Quem.
- Prosdocimi, A. (1880). Le necropoli euganee ed una tomba della Villa Benvenuti in Este. *Bullettino di Paleontologia Italiana*, 6, 79–96 and pls. IV–VI.
- Prosdocimi, A. (1882). Este – Le necropoli euganee atestine. *Notizie degli Scavi di Antichità, Gennaio 1882*, 5–37 and pls. I–VIII.
- Prüssing, G. (1991). *Die Bronzegefäße in Österreich* (Prähistorische Bronzefunde II, 5). Steiner.
- Rabsilber, T., Wendling, H., & Wiltschke-Schrotta, K. (2017). *Der Dürrnberg bei Hallen. Die Gräbergruppe im Eisfeld* (Dürrnberg-Forschungen 10). Leidorf.
- Rizzetto, G. (1978). Paletta ‘rituale’ in bronzo con decorazione zoomorfa. In A. Aspes (Ed.), *L’arte preistorica nell’Italia settentrionale dalle origini alla civiltà paleoveneta* (p. 110 and fig. 27, no. 3). Linotopia Alfio Fiorini.
- Ruta Serafini, A. (2021). Coperchio Rebato. In F. Gonzato, B. Grassi, & D. Voltolini (Eds.), *Le fiere della vanità: l’arte dei Veneti antichi* (pp. 30–31). Vago di Lavagno: Tipolitografia La Grafica Editrice.
- Sabbatini, T. (2008). 307. Cista. In M. Silvestrini & T. Sabbatini (Eds.), *Potere e Splendore. Gli antichi Piceni a Matelica. 19 aprile – 31 ottobre 2008, Matelica, Palazzo Ottoni* (pp. 231–233). ‘L’Erma’ di Bretschneider.
- Saccoccio, F. (2021). Biographies of Situla Art objects recycled as ex-votos between the Adige and Inn valleys (NE Italy and west Austria). In A. Weidinger & J. Leskovar (Eds.), *Interpretierte Eisenzeiten. Fallstudien, Methoden, Theorie. Tagungsbeiträge der 9. Linzer Gespräche zur interpretativen Eisenzeitarchäologie* (Studien zur Kulturgeschichte von Oberösterreich Folge 51) (pp. 53–74). Linz: OÖ Landes-Kultur.
- Sacken, E. F. (1868). *Das Grabfeld von Hallstatt in Oberösterreich und Dessen Alterthümer*. Wilhelm Braumüller.
- Salerno, R. (2002). I bronzi e gli altri votivi. In A. Ruta Serafini (Ed.), *Este preromana: una città e i suoi santuari* (pp. 149–163). Canova Edizioni.

- Salzani, L. (1976). Gazzo Veronese. In *3000 anni fa a Verona: dalla fine dell'età del Bronzo all'arrivo dei Romani nel territorio veronese* (pp. 168–173 and pls. 26–38). Linotipia Alfio Fiorini.
- Salzani, L. (1984). Gazzo Veronese (Verona). *Studi Etruschi*, 50(1982), 471–472 and pl. LXIV.
- Salzani, L. (1985). *Preistoria e Protostoria nella media pianura veronese*. Vago di Lavagno: Tipografia 'La Grafica'.
- Salzani, L. (1987a). Le schede. In L. Salzani (Ed.), *La preistoria lungo la valle del Tartaro* (pp. 89–142). Vago di Lavagno: Tipolitografia 'La Grafica'.
- Salzani, L. (1987b). Gazzo Veronese. In *Prima della storia: inediti di 10 anni di ricerche a Verona* (pp. 179–180). Vago di Lavagno: Tipolitografia 'La Grafica'.
- Salzani, L. (1987c). Dosso del Pol. In *Prima della storia: inedita di 10 anni di ricerche a Verona* (pp. 151–153). Vago di Lavagno: Tipolitografia 'La Grafica'.
- Salzani, L. (1987d). Panorama storico. In L. Salzani (Ed.), *La preistoria lungo la valle del Tartaro* (pp. 35–88). Vago di Lavagno: Tipolitografia 'La Grafica'.
- Salzani, L. (1991). La necropoli paleoveneta di Dosso del Pol a Gazzo Veronese. I materiali sporadici. *Bollettino del Museo Civico di Storia Naturale di Verona*, 15(1988), 475–501.
- Salzani, L. (1997). Gazzo Veronese, necropoli paleoveneta in località Turbine-Chievo. *Quaderni di Archeologia del Veneto*, 13, 75 and fig. 1, nos. 4–5.
- Salzani, L. (2002). Età del Ferro. In A. Aspes (Ed.), *Preistoria Veronese: Contributi e aggiornamenti* (Memorie del Museo Civico di Storia Naturale di Verona – 2<sup>a</sup> serie, Sezione Scienze dell'Uomo, 5) (pp. 157–215 and pls. XIV–XVI). Verona: Museo Civico di Storia Naturale.
- Salzani, L. (2008). Necropoli dei Veneti antichi nel territorio veronese. In *I Veneti antichi: Novità e aggiornamenti. Atti del convegno di studio, Isola della Scala 15 ottobre 2005* (pp. 47–58). Caselle di Sommacampagna: Cierre Edizioni.
- Salzani, L. (2013). 2.1.7 Elmo conico. In M. Gamba, G. Gambacurta, A. Ruta Serafini, V. Tiné, & F. Veronese (Eds.), *Venetkens: Viaggio nella terra dei Veneti antichi* (pp. 210–211). Marsilio Editori.
- Salzani, L. (2018). *Necropoli dei Veneti antichi a Ca' del Ferro di Oppeano* (Verona) (Documenti di Archeologia 60). Quingentole: SAP Società Archeologica s.r.l.
- Salzani, L., & Morelato, M. (2022). *I veneti antichi a Gazzo Veronese. La necropoli della Colombara* (Documenti di Archeologia 69). Quingentole: SAP Società Archeologica s.r.l.

- Samonig, B. (1996). *Die archäologische Sammlung von Rudolf Egger im Landesmuseum Klagenfurt/Kärnten und im Heimatmuseum Möderndorf bei Hermagor/Kärnten*. Unpublished Master dissertation at the University of Vienna.
- Santarelli, A. (1887). Forlì – Bronzi arcaici scoperti presso Forlì, e descritti dall'isp. cav. A. Santarelli. *Notizie degli Scavi di Antichità, Gennaio 1887*, 8–14 and pl. I.
- Santinon, F. (2016). Il restauro del coltello con fodero dalla tomba 118 di Montebelluna (TV), località Posmon. *De Rerum Natura. Quaderni del Museo di Storia Naturale e Archeologia di Montebelluna*, 8(2015), 69–77.
- Sassatelli, G. (1989). Ancora sui rapporti tra Etruria Padana e Italia settentrionale: qualche esemplificazione. In *Gli Etruschi a nord del Po. Atti del Convegno, Mantova 4-5 ottobre 1986* (pp. 49–81). Mantua: Accademia Nazionale Virgiliana di Scienze Lettere e Arti.
- Sassatelli, G. (2018). Etruschi e Italici in Italia settentrionale: rapporti culturali e mobilità individuale. In L. Aigner-Foresti & P. Amann (Eds.), *Beiträge zur Sozialgeschichte der Etrusker. Akten der internationalen Tagung, Wien, 8.-10. 6. 2016* (PHERSU, Etrusco-italische Studien 1) (pp. 355–370 and pls. 74–78). Holzhausen.
- Sebesta, C. (2003). Lo specchio della Galassina di Castelvetro: un'ipotesi interpretativa. *Studi Trentini di Scienze Storiche*, 82, Sezione I - 3, 605–626.
- Sgubini Moretti, A. M. (1992). Pitino. Necropoli di Monte Penna: tomba 31. In *La civiltà picena nelle Marche. Studi in onore di Giovanni Annibaldi. Ancona, 10/13 luglio 1988* (pp. 178–203). Ripatransone: Gianni Maroni Editore.
- Soranzo, F. (1885). *Scavi e scoperte nei poderi Nazari di Este*. Tipografia della R. Accademia di Lincei.
- Starè, F. (1954). *Pražgodovinske Vače*. Ljubljana: Univerza v Ljubljani.
- Starè, F. (1955). *Vače* (Arheološki Katalogi Slovenije 1). Narodni muzej Slovenije.
- Steiner, H. (1999). 'Kännchen mit Stierkopfhengel' der Fritzens-Sanzeno-Kultur. *Archäologisches Korrespondenzblatt*, 29, 79–92.
- Steiner, H. (2002). Das jüngereisenzeitliche Gräberfeld von Moritzing, Gemeinde Bozen (Südtirol). In U. Tecchiati (Ed.), *Der Heilige Winkel. Der Bozner Talkessel zwischen der Späten Bronzezeit und der Romanisierung (13.-1. Jh. v. Chr.) / Il Sacro Angolo. La conca di Bolzano tra la tarda età del bronzo e la romanizzazione (XIII-I sec. a.C.)* (Schriften des Südtiroler Archäologiemuseums 2) (pp. 155–358). Bolzano/Bozen: Folio.
- Sydow, W. (1995). *Der Hallstattzeitliche Bronzehort von Fliess im Oberinntal, Tirol* (Fundeberichte aus Österreich Materialheft A 3). Horn: Berger & Söhne.

- Tecco Hvala, S. (2012). *Magdalenska gora. Družbena struktura in grobni rituali železnodobne skupnosti / Magdalenska gora. Social structure and burial rites of the Iron Age community* (Opera Instituti Archaeologici Sloveniae 26). Ljubljana: Inštitut za arheologijo ZRC SAZU, Založba ZRC.
- Tecco Hvala, S. (2017). *Molnik pri Ljubljani v železni dobi / Molnik. The Iron Age site at Molnik near Ljubljana* (Opera Instituti Archaeologici Sloveniae 36). Ljubljana: ZRC SAZU, Institut za arheologijo, Založba ZRC.
- Tecco Hvala, S., Dular, J., & Kocuvan, E. (2004). *Železnodobne Gomile na Magdalenski gori / Eisenzeitliche Grabhügel auf der Magdalenska gora* (Katalogi in monografije 36). Narodni Muzej Slovenije.
- Teržan, B. (1977). Certoška fibula. *Arheološki vestnik*, 27(1976), 317–536.
- Tirelli, M. (1982). Una nuova lettura della tomba Nazari 161 di Este (Padova). *Archeologia Veneta*, 4(1981), 7–27.
- Tomedi, G., & Appler, H. (2001). Neue Zeugnisse der Situlenkunst aus Nordtirol. In J. Zeisler & G. Tomedi (Eds.), *Kleine Schriften 3: Schriften zur Archäologischen Landeskunde Tirol* (Archäologischen Forschungen und Grabungsberichte aus Tirol) (pp. 113–122). Wattens: ArchaeoTirol.
- Tovoli, S. (1984). 178. Sepolcreto Arnoaldi. In C. Morigi Govi & G. Sassatelli (Eds.), *Dalla stanza delle Antichità al Museo Civico. Storia della formazione del Museo Civico Archeologico di Bologna* (pp. 315–316). Casalecchio di Reno: Grafis Edizioni.
- Tschurtschenthaler, M., & Wein, U. (1998). Das Heiligtum auf der Pillerhöhe und seine Beziehungen zur via Claudia Augusta. In E. Walde (Ed.), *Via Claudia: Neue Forschungen* (pp. 227–259). Institut für Klassische Archäologie der Leopold-Franzens-Universität Innsbruck.
- Turk, P. (2005). *Images of life and myth*. Narodni muzej Slovenije.
- Uboldi, M. (2021). Coperchio di Grandate, tomba I/1885. In F. Gonzato, B. Grassi, & D. Voltolini (Eds.), *Le fiere della vanità: l'arte dei Veneti antichi* (pp. 32–33). Vago di Lavagno: Tipolitografia La Grafica Editrice.
- Umetnost situla* (1964). Belgrade: Beogradski Grafički Zavod.
- Vanzetti, A., Bertoldo, M., Di Maria, F., Monti, D., Salzani, L., & Saccoccio, F. (2020). Coazze near Gazzo Veronese, on the Fringes of Veneto and Etruria Padana, NE Italy. In L. Zamboni, M. Fernández-Götz, & C. Metzner-Nebelsick (Eds.), *Crossing the Alps: Early Urbanism between northern Italy and Central Europe (900-400 BC)* (pp. 171–191). Sidestone Press.



- Verger, S. (2017). Du princeps mourant au défunt héroïsé: les métamorphoses d'un trône. La situle Benvenuti d'Este, premier chef d'œuvre de l'art des situles. *Bollettino d'Arte*, 7(33-34), 1–30.
- Vitri, S. (2013). 6.3 Coperchio figurato e situla. In M. Gamba, G. Gambacurta, A. Ruta Serafini, V. Tiné, & F. Veronese (Eds.), *Venetkens: viaggio nella terra dei Veneti antichi* (pp. 289, 291). Marsilio Editori.
- Voltolini, D. (2020). La Situla di Caravaggio: studio e interpretazione. In C. Longhi & D. Voltolini (Eds.), *La Situla di Caravaggio. Un capolavoro inaspettato* (Guide MAGO 1) (pp. 29–48 and pl. 1). Quingentole: SAP Società Archeologica s.r.l.
- Voltolini, D. (2021a). Coperchio di Numana. In F. Gonzato, B. Grassi, & D. Voltolini (Eds.), *Le fiere della vanità: l'arte dei Veneti antichi* (pp. 36–37). Vago di Lavagno: Tipolitografia La Grafica Editrice.
- Voltolini, D. (2021b). Elmo di Pitino. In F. Gonzato, B. Grassi, & D. Voltolini (Eds.), *Le fiere della vanità: l'arte dei Veneti antichi* (pp. 38-39). Vago di Lavagno: Tipolitografia La Grafica Editrice.
- Von Hochstetter, F. (1883). Die Neuesten Gräberfunde von Watsch und St. Margarethen in Krain und der Culturkreis der Hallstätter-Periode. *Denkschriften der Mathematisch-Naturwissenschaftlichen Classe der Kaiserlichen Akademie der Wissenschaften*, 47, 161–210.
- Von Merhart, G. (1952). Studien über einige Gattungen von Bronzegefäßen (Hierzu Tafel 1-26). *Festschrift des Römisch-Germanischen Zentralmuseums in Mainz zur Feier seines hunderjährigen Bestehens*, 2, 1–71 and pls. 1–26.
- Woldrich, W. (1978). *Die Funde aus Este in der Prähistorischen Abteilung im Naturhistorischen Museum in Wien*. Unpublished dissertation at the University of Innsbruck.
- Zaghetto, L. (2001). *Il linguaggio figurato dell'arte delle situle. Per una nuova metodologia della ricerca*. Unpublished PhD thesis at the University of Padua.
- Zaghetto, L. (2017). *La situla Benvenuti di Este: Il poema figurato degli antichi Veneti* (Ricerche 4). Ante Quem.
- Zaghetto, L. (2018). Il metodo narrativo nell'Arte delle situle. *Arimestos, Ricerche di Protostoria Mediterranea*, 1, 239–250.
- Zaghetto, L. (2022). *La situla Certosa di Bologna. Alle origini della ritualità nell'Italia protostorica* (Ricerche 9). Ante Quem.
- Zaghetto, L., & Buson, S. (2022). La situla Arnoaldi di Bologna. Lettura iconografica e tecnologica. In M. Gamba, G. Gambacurta, F. Gonzato, E. Pettenò, & F. Veronese (Eds.), *Metalli, creta, una piuma*

*d'uccello ... Studi di archeologia per Angela Ruta Serafini (da W. Szymborska, Museo, v.11)*  
(Documenti di Archeologia 67) (pp. 203–219). Quingentole: SAP Società Archeologica s.r.l.

Zannoni, A. (1876–1884). *Gli Scavi della Certosa di Bologna*. Bologna: Regia Tipografia.

Zeller, K. W. (2004). L'aristocrazia del sale sul Dürrenberg. In F. Marzatico & P. Gleirscher (Eds.), *Guerrieri Principi ed Eroi fra il Danubio e il Po dalla preistoria all'Alto Medioevo* (pp. 388–401). Trento: TEMI.

Zemmer-Plank, L. (1976). Situlenkunst in Tirol. *Veröffentlichungen des Tiroler Landesmuseums Ferdinandeum*, 56, 289–337.

Zuffa, M. (1960). Le palette rituali in bronzo. Contributo alla conoscenza dell'età del ferro in Italia. *Atti e Memorie della Deputazione di Storia Patria per le Provincie di Romagna*, 8(1956-1957), 67–170.
